# Supplementary material
Source: PubMed Central journal article supplement (PMC5378109)

**Figure S1 (related to Figure 4).** The development of amphid neurons appears superficially normal in *mut-16(pk710)* adult animals based on their ability to uptake a lyophobic, fluorescent dye. Representative DIC and fluorescent images are shown. The cell bodies of amphid neurons relevant to this study are labeled.

**A Wild-type**

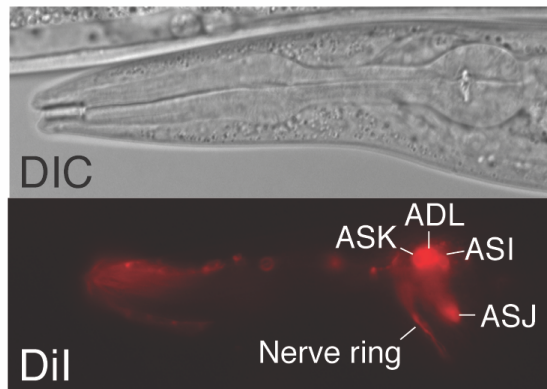

**B *mut-16(pk710)***

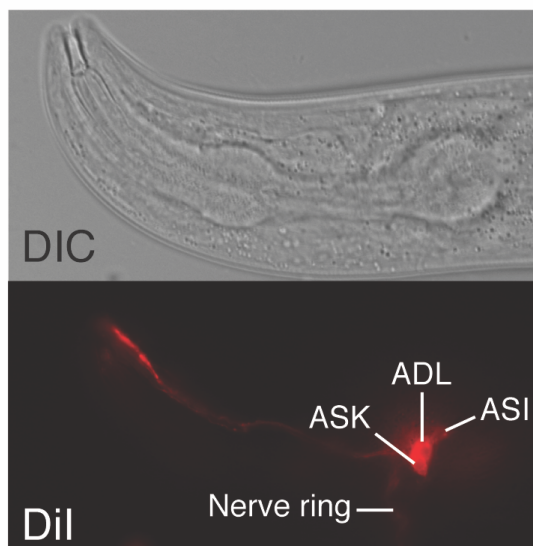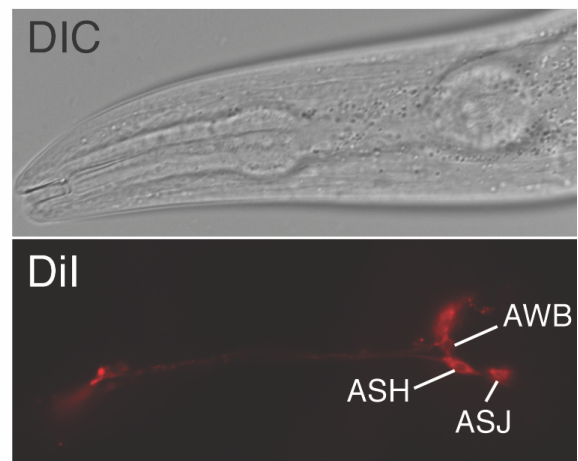

Supplement: 1503FigureS1.pdf [file 1503FigureS1.pdf]
